# Supplementary material
Source: publisher figshare collection journal article supplement (https://frontiersin.figshare.com/ndownloader/files/12543155)
Supplement: Supplementary file [file 12543155]

## Supplemental Figure 2

### Stage 9 (metabolic switch, presecretory)

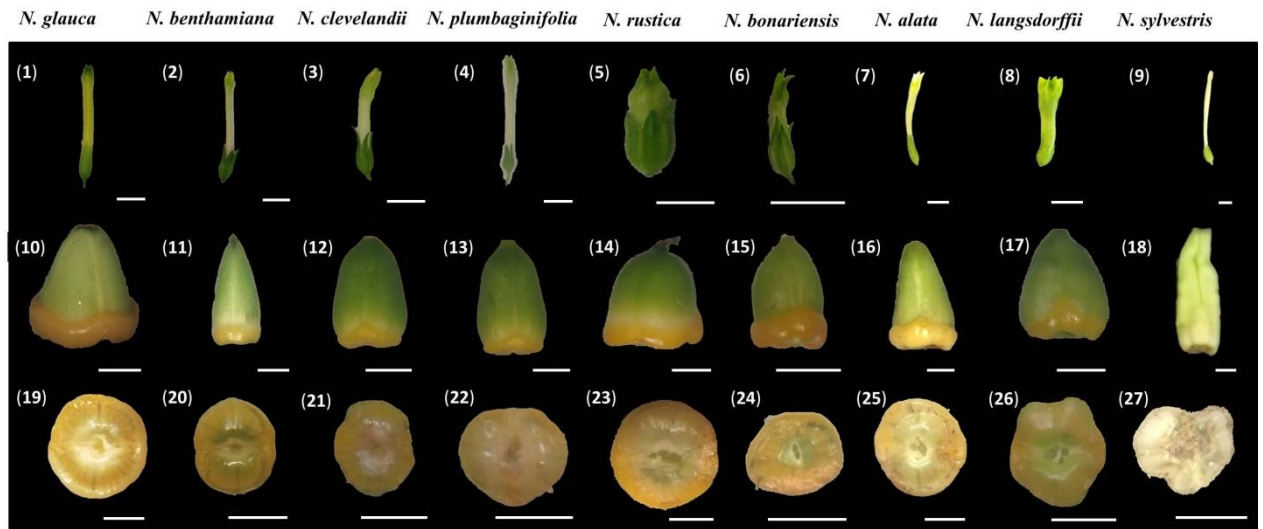

**Supplemental Figure 2.** Flowers (1-9), ovary (10-18) and nectary gland cross section (19-27) of nine species from *Nicotiana* at **stage 9**. (1, 10 and 19) *N. glauca*; (2, 11 and 20) *N. benthamiana*; (3, 12 and 21) *N. clevelandii*; (4, 13 and 22) *N. plumbaginifolia*; (5, 14 and 23) *N. rustica*; (6, 15 and 24) *N. bonariensis*; (7, 16 and 25) *N. alata*; (8, 17 and 26) *N. langsdorffii*; (9, 18 and 27) *N. sylvestris* (1-9 Bar = 1 cm); (10-18 Bar = 0.1 cm); (19-27 Bar = 0.1 cm).
